# Supplementary material
Source: Springer Nature journal article supplement (https://www.springermedizin.de/resource/supplementary/12889_2007_1110_MOESM1_ESM.pdf/9502486)

### Males

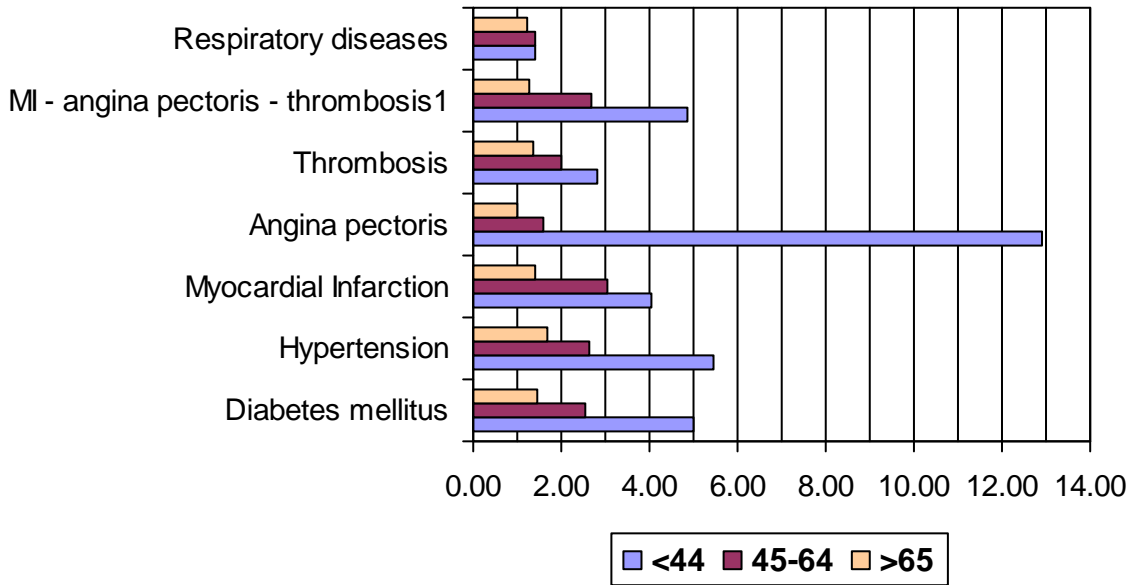

### Females

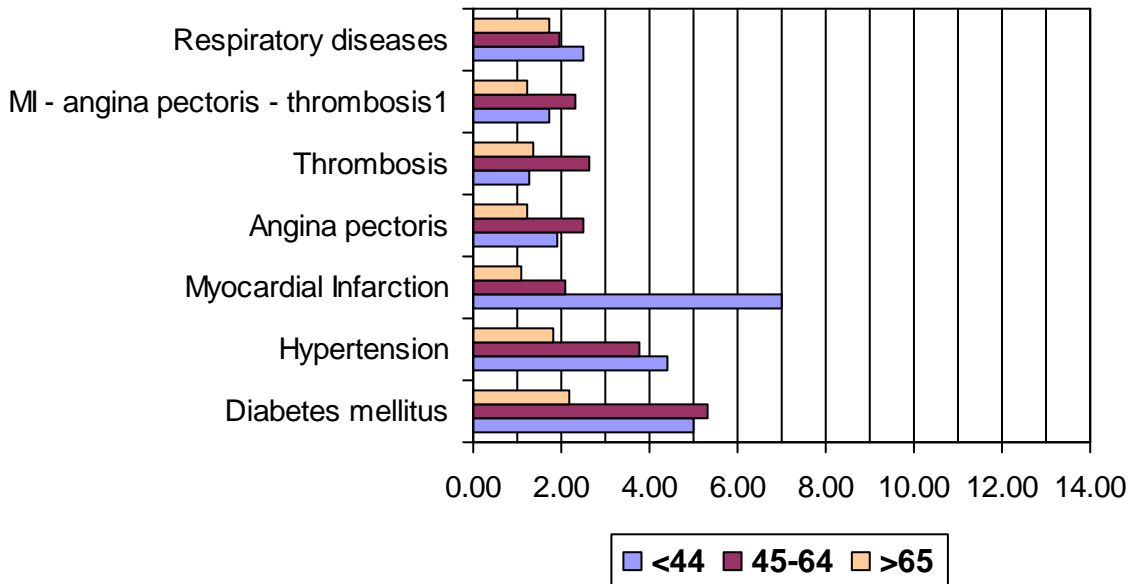

Supplement: MOESM1 [file 9502486]
